# Supplementary material for: Dietary Interventions of Salmon and Silver Carp Phospholipids on Mice with Metabolic Syndrome Based on Lipidomics
Source: MDPI journal article supplement (doi:10.3390/cells11203199), 2022-10-12
Supplement: s1 [file s1]

**Supplementary Table S1**

| Ingredient (g kg <sup>-1</sup> ) | LF   | HF   | SA4  | SA2  | HM4  | HM2  |
|----------------------------------|------|------|------|------|------|------|
| Casein                           | 200  | 200  | 200  | 200  | 200  | 200  |
| Corn starch                      | 600  | 250  | 210  | 230  | 210  | 230  |
| Fructose                         | -    | 200  | 200  | 200  | 200  | 200  |
| Corn oil                         | 50   | 50   | 50   | 50   | 50   | 50   |
| Lard                             | -    | 150  | 150  | 150  | 150  | 150  |
| Sesame oil                       | 50   | 50   | 50   | 50   | 50   | 50   |
| Mineral                          | 35   | 35   | 35   | 35   | 35   | 35   |
| Vitamin                          | 10   | 10   | 10   | 10   | 10   | 10   |
| Cellulose                        | 50   | 50   | 50   | 50   | 50   | 50   |
| Choline bitartrate               | 3    | 3    | 3    | 3    | 3    | 3    |
| DL- Methionine                   | 2    | 2    | 2    | 2    | 2    | 2    |
| Salmon phospholipid              | -    | -    | 40   | 20   | -    | -    |
| silver carp phospholipid         | -    | -    | -    | -    | 40   | 20   |
| Total                            | 1000 | 1000 | 1000 | 1000 | 1000 | 1000 |
| Energy (Kcal g <sup>-1</sup> )   | 3.86 | 4.86 | 4.86 | 4.86 | 4.86 | 4.86 |

Note: Feed ingredients in animal experiment
