# Supplementary material for: Dietary Interventions of Salmon and Silver Carp Phospholipids on Mice with Metabolic Syndrome Based on Lipidomics
Source: Cells. 2022 Oct 12;11(20):3199. doi: 10.3390/cells11203199 (PMC9601277; doi:10.3390/cells11203199)
Supplement: Supplementary file 1 [file cells-11-03199-s001.zip]

Archive with 4 entries (4 files):
- Supplementary Figure S1. Histological examination of the mice liver tissue.pdf
- Supplementary Table S1. The feed ingredients.pdf
- Supplementary Table S2. Screening by expression of lipids.xlsx
- Supplementary Table S3. Lipid species with significant variations in different types of lipid groups and LF and HF groups.xlsx
