# Supplementary material for: Dietary Interventions of Salmon and Silver Carp Phospholipids on Mice with Metabolic Syndrome Based on Lipidomics
Source: Cells. 2022 Oct 12;11(20):3199. doi: 10.3390/cells11203199 (PMC9601277; doi:10.3390/cells11203199)
Supplement: Supplementary file 1 [file cells-11-03199-s001.zip › Supplementary Table S2. Screening by expression of lipids.xlsx]

## Sheet: Sheet1
Compounds	Main class	Sub class	Cluster Group	Cpd_ID	kegg_map
9,10-EpOME	FA	Eicosanoid	1	C14825	ko00591,ko01100
9,10-DiHOME	FA	Eicosanoid	5	C14828	ko00591
11,12-EET	FA	Eicosanoid	1	C14770	ko00590,ko01100,ko04270,ko04726,ko04913
(±)15-HETE	FA	Eicosanoid	7	C04742	ko00590,ko04750
11(S)-HETE	FA	Eicosanoid	1	-	--
11-deoxy PGE1	FA	Eicosanoid	3	-	--
PGD2	FA	Eicosanoid	5	C00696	ko00590,ko01100,ko04080,ko04664,ko04726,ko05143,ko05310
PGE2	FA	Eicosanoid	1	C00584	ko00590,ko01100,ko04024,ko04080,ko04625,ko04726,ko04750,ko04921,ko04923,ko04924,ko04976,ko05140,ko05143,ko05146,ko05163,ko05165,ko05200,ko05323
PGK1	FA	Eicosanoid	3	-	--
5-iso PGF2VI	FA	Eicosanoid	3	-	--
PGE1	FA	Eicosanoid	2	C04741	--
FFA(4:0)	FA	FFA	4	-	--
FFA(11:0)	FA	FFA	2	-	--
FFA(12:0)	FA	FFA	12	C02679	ko00061,ko01100
FFA(13:0)	FA	FFA	12	-	--
FFA(14:0)	FA	FFA	10	C06424	ko00061,ko01100
FFA(15:0)	FA	FFA	10	C16537	--
FFA(20:0)	FA	FFA	3	C06425	ko01040
FFA(21:0)	FA	FFA	12	-	--
FFA(22:0)	FA	FFA	10	C08281	ko01040
FFA(24:0)	FA	FFA	3	C08320	ko01040
FFA(16:1)	FA	FFA	10	C08362	ko00061
FFA(17:1)	FA	FFA	10	C12100	--
FFA(18:1)	FA	FFA	10	C00712	ko00061,ko01040,ko04212
FFA(19:1)	FA	FFA	10	-	--
FFA(20:1)	FA	FFA	10	C16526	ko01040
FFA(24:1)	FA	FFA	10	C05950	ko00590
FFA(16:2)	FA	FFA	10	-	--
FFA(18:2)	FA	FFA	10	C20388	--
FFA(20:2)	FA	FFA	10	C16525	ko01040
FFA(18:3)	FA	FFA	10	C08364	--
FFA(20:3)	FA	FFA	1	-	--
FFA(22:3)	FA	FFA	8	-	--
FFA(24:4)	FA	FFA	1	-	--
FFA(20:5)	FA	FFA	5	C06428	ko01040
FFA(24:5)	FA	FFA	12	-	--
FFA(24:6)	FA	FFA	9	-	--
LPC(16:1/0:0)	GP	LPC	6	C04230	ko00564,ko05231
LPC(18:1/0:0)	GP	LPC	6	C04230	ko00564,ko05231
LPE(0:0/24:0)	GP	LPE	5	C04438	ko00564
LPE(0:0/16:1)	GP	LPE	6	C04438	ko00564
LPE(0:0/18:1)	GP	LPE	9	C04438	ko00564
LPE(0:0/20:3)	GP	LPE	6	C04438	ko00564
LPE(0:0/20:4)	GP	LPE	6	C04438	ko00564
PA(16:0/18:0)	GP	PA	5	C00416	ko00561,ko00564,ko01100,ko04024,ko04070,ko04072,ko04666,ko04912,ko04975,ko05200,ko05212,ko05231
PA(16:0/20:0)	GP	PA	5	C00416	ko00561,ko00564,ko01100,ko04024,ko04070,ko04072,ko04666,ko04912,ko04975,ko05200,ko05212,ko05231
PA(22:0/16:0)	GP	PA	5	C00416	ko00561,ko00564,ko01100,ko04024,ko04070,ko04072,ko04666,ko04912,ko04975,ko05200,ko05212,ko05231
PA(18:0/18:1)	GP	PA	8	C00416	ko00561,ko00564,ko01100,ko04024,ko04070,ko04072,ko04666,ko04912,ko04975,ko05200,ko05212,ko05231
PA(16:0/20:1)	GP	PA	1	C00416	ko00561,ko00564,ko01100,ko04024,ko04070,ko04072,ko04666,ko04912,ko04975,ko05200,ko05212,ko05231
PA(20:1/18:0)	GP	PA	1	C00416	ko00561,ko00564,ko01100,ko04024,ko04070,ko04072,ko04666,ko04912,ko04975,ko05200,ko05212,ko05231
PA(18:1/20:0)	GP	PA	5	C00416	ko00561,ko00564,ko01100,ko04024,ko04070,ko04072,ko04666,ko04912,ko04975,ko05200,ko05212,ko05231
PC(14:0/18:1)	GP	PC	6	C00157	ko00564,ko00590,ko00591,ko00592,ko01100,ko04723,ko05231
PC(18:0/18:1)	GP	PC	1	C00157	ko00564,ko00590,ko00591,ko00592,ko01100,ko04723,ko05231
PC(16:1/18:1)	GP	PC	6	C00157	ko00564,ko00590,ko00591,ko00592,ko01100,ko04723,ko05231
PC(18:0/18:2)	GP	PC	1	C00157	ko00564,ko00590,ko00591,ko00592,ko01100,ko04723,ko05231
PC(18:1/18:1)	GP	PC	6	C00157	ko00564,ko00590,ko00591,ko00592,ko01100,ko04723,ko05231
PC(16:1/18:2)	GP	PC	6	C00157	ko00564,ko00590,ko00591,ko00592,ko01100,ko04723,ko05231
PC(16:0/18:3)	GP	PC	6	C00157	ko00564,ko00590,ko00591,ko00592,ko01100,ko04723,ko05231
PC(18:0/20:3)	GP	PC	6	C00157	ko00564,ko00590,ko00591,ko00592,ko01100,ko04723,ko05231
PC(18:2/18:2)	GP	PC	6	C00157	ko00564,ko00590,ko00591,ko00592,ko01100,ko04723,ko05231
PC(16:0/20:4)	GP	PC	1	C00157	ko00564,ko00590,ko00591,ko00592,ko01100,ko04723,ko05231
PC(20:3/18:1)	GP	PC	6	C00157	ko00564,ko00590,ko00591,ko00592,ko01100,ko04723,ko05231
PC(18:0/22:4)	GP	PC	1	C00157	ko00564,ko00590,ko00591,ko00592,ko01100,ko04723,ko05231
PC(16:0/20:5)	GP	PC	1	C00157	ko00564,ko00590,ko00591,ko00592,ko01100,ko04723,ko05231
PC(18:1/20:4)	GP	PC	1	C00157	ko00564,ko00590,ko00591,ko00592,ko01100,ko04723,ko05231
PE(14:0/18:1)	GP	PE	1	C00350	ko00563,ko00564,ko01100,ko04136,ko04140,ko04723,ko05130,ko05167
PE(18:1/16:0)	GP	PE	7	C00350	ko00563,ko00564,ko01100,ko04136,ko04140,ko04723,ko05130,ko05167
PE(20:1/16:0)	GP	PE	6	C00350	ko00563,ko00564,ko01100,ko04136,ko04140,ko04723,ko05130,ko05167
PE(18:1/18:0)	GP	PE	1	C00350	ko00563,ko00564,ko01100,ko04136,ko04140,ko04723,ko05130,ko05167
PE(20:0/18:1)	GP	PE	1	C00350	ko00563,ko00564,ko01100,ko04136,ko04140,ko04723,ko05130,ko05167
PE(22:0/18:1)	GP	PE	1	C00350	ko00563,ko00564,ko01100,ko04136,ko04140,ko04723,ko05130,ko05167
PE(18:1/16:1)	GP	PE	6	C00350	ko00563,ko00564,ko01100,ko04136,ko04140,ko04723,ko05130,ko05167
PE(18:2/16:0)	GP	PE	3	C00350	ko00563,ko00564,ko01100,ko04136,ko04140,ko04723,ko05130,ko05167
PE(18:0/18:2)	GP	PE	6	C00350	ko00563,ko00564,ko01100,ko04136,ko04140,ko04723,ko05130,ko05167
PE(20:1/18:1)	GP	PE	6	C00350	ko00563,ko00564,ko01100,ko04136,ko04140,ko04723,ko05130,ko05167
PE(16:0/20:3)	GP	PE	6	C00350	ko00563,ko00564,ko01100,ko04136,ko04140,ko04723,ko05130,ko05167
PE(18:2/18:2)	GP	PE	1	C00350	ko00563,ko00564,ko01100,ko04136,ko04140,ko04723,ko05130,ko05167
PE(20:4/18:0)	GP	PE	1	C00350	ko00563,ko00564,ko01100,ko04136,ko04140,ko04723,ko05130,ko05167
PE(14:0/22:6)	GP	PE	12	C00350	ko00563,ko00564,ko01100,ko04136,ko04140,ko04723,ko05130,ko05167
PE(22:6/16:0)	GP	PE	1	C00350	ko00563,ko00564,ko01100,ko04136,ko04140,ko04723,ko05130,ko05167
PE(22:6/18:0)	GP	PE	1	C00350	ko00563,ko00564,ko01100,ko04136,ko04140,ko04723,ko05130,ko05167
PG(16:0/18:1)	GP	PG	3	C00344	ko00564,ko01100
PG(20:1/16:0)	GP	PG	3	C00344	ko00564,ko01100
PG(18:2/20:1)	GP	PG	3	C00344	ko00564,ko01100
PI(18:0/20:4)	GP	PI	1	C01194	ko00562,ko00563,ko00564,ko01100,ko04070,ko04136,ko04140,ko05132,ko05152
Free carnitine	FA	CAR	6	C00318	ko04714,ko04976
Acetyl-carnitine	FA	CAR	6	-	--
Propionyl-carnitine	FA	CAR	10	C03017	--
hydroxybutyryl-carnitine	FA	CAR	9	-	--
Hexanoyl-carnitine	FA	CAR	7	-	--
hydroxyisovaleroyl-carnitine	FA	CAR	6	-	--
Octanoyl-carnitine	FA	CAR	7	-	--
Decanoyl-carnitine	FA	CAR	8	-	--
Lauroyl-carnitine	FA	CAR	8	-	--
3-Hydroxy-dodecanoyl-carnitine	FA	CAR	2	-	--
Myristoyl-carnitine	FA	CAR	7	-	--
3-Hydroxy-tetradecanoyl- carnitine	FA	CAR	7	-	--
Palmitoyl-carnitine	FA	CAR	5	C02990	ko00071,ko01212
3-Hydroxy-hexadecanoyl-carnitine	FA	CAR	7	-	--
Stearoyl-carnitine	FA	CAR	5	-	--
3-Hydroxy-octadecanoyl-carnitine	FA	CAR	4	-	--
2-hexenoyl-carnitine	FA	CAR	10	C02301	ko04714
Decenoyl-carnitine	FA	CAR	8	C012301	ko04714
3-Hydroxy-decenoyl- carnitine	FA	CAR	8	-	--
Dodecenoyl-carnitine	FA	CAR	8	C02301	ko04714
Palmitoleoyl- carnitine	FA	CAR	7	-	--
3-Hydroxy-palmitoleoyl- carnitine	FA	CAR	8	C02301	ko04714
Oleyl-carnitine	FA	CAR	5	-	--
3-Hydroxy-octadecenoyl-carnitine	FA	CAR	7	C02301	ko04714
Tetradecadienoyl- carnitine	FA	CAR	8	C02301	ko04714
Palmitodileoyl- carnitine	FA	CAR	7	-	--
Linoleyl-carnitine	FA	CAR	7	-	--
3-Hydroxy-linoleyl- carnitine	FA	CAR	7	-	--
CE(16:0)	ST	CE	5	C11251	--
CE(18:0)	ST	CE	6	C02530	ko00100,ko04913,ko04975,ko04976,ko04977,ko04979
CE(16:1)	ST	CE	1	C02530	ko00100,ko04913,ko04975,ko04976,ko04977,ko04979
CE(18:1)	ST	CE	1	C14641	--
CE(20:1)	ST	CE	10	C02530	ko00100,ko04913,ko04975,ko04976,ko04977,ko04979
CE(22:1)	ST	CE	10	-	--
CE(18:2)	ST	CE	1	C15441	--
CE(18:3)	ST	CE	1	C02530	ko00100,ko04913,ko04975,ko04976,ko04977,ko04979
CE(20:3)	ST	CE	12	C02530	ko00100,ko04913,ko04975,ko04976,ko04977,ko04979
CE(20:4)	ST	CE	10	C02530	ko00100,ko04913,ko04975,ko04976,ko04977,ko04979
CE(22:4)	ST	CE	12	C02530	ko00100,ko04913,ko04975,ko04976,ko04977,ko04979
CE(20:5)	ST	CE	6	C02530	ko00100,ko04913,ko04975,ko04976,ko04977,ko04979
CE(22:6)	ST	CE	9	C02530	ko00100,ko04913,ko04975,ko04976,ko04977,ko04979
Cer(d18:0/16:0)	SL	Cer	4	C00195	ko00600,ko01100,ko04071,ko04217,ko04722,ko04920,ko04931,ko04933,ko05140
Cer(d18:0/18:0)	SL	Cer	5	C00195	ko00600,ko01100,ko04071,ko04217,ko04722,ko04920,ko04931,ko04933,ko05140
Cer(d18:0/20:0)	SL	Cer	4	C00195	ko00600,ko01100,ko04071,ko04217,ko04722,ko04920,ko04931,ko04933,ko05140
Cer(d18:0/22:0)	SL	Cer	4	C00195	ko00600,ko01100,ko04071,ko04217,ko04722,ko04920,ko04931,ko04933,ko05140
Cer(d18:0/24:0)	SL	Cer	4	C00195	ko00600,ko01100,ko04071,ko04217,ko04722,ko04920,ko04931,ko04933,ko05140
Cer(d18:1/16:0)	SL	Cer	10	C00195	ko00600,ko01100,ko04071,ko04217,ko04722,ko04920,ko04931,ko04933,ko05140
Cer(d18:1/18:0)	SL	Cer	7	C00195	ko00600,ko01100,ko04071,ko04217,ko04722,ko04920,ko04931,ko04933,ko05140
Cer(d18:1/20:0)	SL	Cer	1	C00195	ko00600,ko01100,ko04071,ko04217,ko04722,ko04920,ko04931,ko04933,ko05140
Cer(d18:1/24:0)	SL	Cer	4	C00195	ko00600,ko01100,ko04071,ko04217,ko04722,ko04920,ko04931,ko04933,ko05140
Cer(d18:1/16:1)	SL	Cer	3	C00195	ko00600,ko01100,ko04071,ko04217,ko04722,ko04920,ko04931,ko04933,ko05140
Cer(d18:1/18:1)	SL	Cer	2	C00195	ko00600,ko01100,ko04071,ko04217,ko04722,ko04920,ko04931,ko04933,ko05140
Cer(d18:1/20:1)	SL	Cer	10	C00195	ko00600,ko01100,ko04071,ko04217,ko04722,ko04920,ko04931,ko04933,ko05140
Cer(d18:1/24:1)	SL	Cer	12	C00195	ko00600,ko01100,ko04071,ko04217,ko04722,ko04920,ko04931,ko04933,ko05140
Cer(d18:1/26:1)	SL	Cer	4	C00195	ko00600,ko01100,ko04071,ko04217,ko04722,ko04920,ko04931,ko04933,ko05140
HexCer(d18:1/16:1)	SL	Cer-Hex	12	-	--
HexCer(d18:1/24:1)	SL	Cer-Hex	3	C01190	ko00600,ko01100
CerP(d18:1/12:0)	SL	CerP	7	-	--
CerP(d18:1/14:0)	SL	CerP	5	-	--
CerP(d18:1/16:0)	SL	CerP	4	-	--
CerP(d18:1/18:0)	SL	CerP	4	-	--
CerP(d18:1/20:0)	SL	CerP	4	-	--
CerP(d18:1/16:1)	SL	CerP	1	-	--
CerP(d18:1/18:1)	SL	CerP	5	-	--
CerP(d18:1/18:2)	SL	CerP	2	-	--
CerP(d18:1/18:3)	SL	CerP	3	-	--
CerP(d18:1/20:3)	SL	CerP	3	-	--
Cer(t18:0/22:0)	SL	Cert	2	-	--
Cer(t18:0/24:0)	SL	Cert	2	-	--
Cer(t18:0/24:1)	SL	Cert	3	-	--
Cer(t18:0/20:2)	SL	Cert	8	-	--
Coenzyme Q9	PR	COQ	3	C00399	ko00130,ko00190,ko01100
Coenzyme Q10	PR	COQ	3	C00399	ko00130,ko00190,ko01100
DG(14:0/16:0/0:0)	GL	DG	6	C00641	ko00561,ko00562,ko00564,ko01100,ko04070,ko04730
DG(14:0/16:1/0:0)	GL	DG	1	C00641	ko00561,ko00562,ko00564,ko01100,ko04070,ko04730
DG(14:0/18:1/0:0)	GL	DG	9	C00641	ko00561,ko00562,ko00564,ko01100,ko04070,ko04730
DG(16:0/16:1/0:0)	GL	DG	1	C00641	ko00561,ko00562,ko00564,ko01100,ko04070,ko04730
DG(14:1/20:0/0:0)	GL	DG	4	C00641	ko00561,ko00562,ko00564,ko01100,ko04070,ko04730
DG(16:0/18:1/0:0)	GL	DG	9	C00641	ko00561,ko00562,ko00564,ko01100,ko04070,ko04730
DG(16:0/20:1/0:0)	GL	DG	9	C00641	ko00561,ko00562,ko00564,ko01100,ko04070,ko04730
DG(18:0/18:1/0:0)	GL	DG	9	C00641	ko00561,ko00562,ko00564,ko01100,ko04070,ko04730
DG(16:1/16:1/0:0)	GL	DG	6	C00641	ko00561,ko00562,ko00564,ko01100,ko04070,ko04730
DG(14:0/18:2/0:0)	GL	DG	9	C00641	ko00561,ko00562,ko00564,ko01100,ko04070,ko04730
DG(16:1/18:1/0:0)	GL	DG	9	C00641	ko00561,ko00562,ko00564,ko01100,ko04070,ko04730
DG(16:0/18:2/0:0)	GL	DG	9	C00641	ko00561,ko00562,ko00564,ko01100,ko04070,ko04730
DG(18:1/18:1/0:0)	GL	DG	10	C00641	ko00561,ko00562,ko00564,ko01100,ko04070,ko04730
DG(18:0/18:2/0:0)	GL	DG	9	C00641	ko00561,ko00562,ko00564,ko01100,ko04070,ko04730
DG(18:1/20:1/0:0)	GL	DG	10	C00641	ko00561,ko00562,ko00564,ko01100,ko04070,ko04730
DG(18:1/20:0/0:0)	GL	DG	10	C00641	ko00561,ko00562,ko00564,ko01100,ko04070,ko04730
DG(18:2/20:0/0:0)	GL	DG	6	C00641	ko00561,ko00562,ko00564,ko01100,ko04070,ko04730
DG(16:1/18:2/0:0)	GL	DG	9	C00641	ko00561,ko00562,ko00564,ko01100,ko04070,ko04730
DG(16:0/18:3/0:0)	GL	DG	6	C00641	ko00561,ko00562,ko00564,ko01100,ko04070,ko04730
DG(16:1/20:2/0:0)	GL	DG	10	C00641	ko00561,ko00562,ko00564,ko01100,ko04070,ko04730
DG(18:1/18:2/0:0)	GL	DG	10	C00641	ko00561,ko00562,ko00564,ko01100,ko04070,ko04730
DG(16:0/20:3/0:0)	GL	DG	1	C00641	ko00561,ko00562,ko00564,ko01100,ko04070,ko04730
DG(18:2/20:1/0:0)	GL	DG	9	C00641	ko00561,ko00562,ko00564,ko01100,ko04070,ko04730
DG(18:2/18:2/0:0)	GL	DG	10	C00641	ko00561,ko00562,ko00564,ko01100,ko04070,ko04730
DG(18:1/18:3/0:0)	GL	DG	10	C00641	ko00561,ko00562,ko00564,ko01100,ko04070,ko04730
DG(16:0/20:4/0:0)	GL	DG	1	C00641	ko00561,ko00562,ko00564,ko01100,ko04070,ko04730
DG(18:1/20:3/0:0)	GL	DG	9	C00641	ko00561,ko00562,ko00564,ko01100,ko04070,ko04730
DG(18:2/18:3/0:0)	GL	DG	9	C00641	ko00561,ko00562,ko00564,ko01100,ko04070,ko04730
DG(16:1/20:4/0:0)	GL	DG	6	C00641	ko00561,ko00562,ko00564,ko01100,ko04070,ko04730
DG(14:0/22:5/0:0)	GL	DG	4	C00641	ko00561,ko00562,ko00564,ko01100,ko04070,ko04730
DG(18:1/20:4/0:0)	GL	DG	9	C00641	ko00561,ko00562,ko00564,ko01100,ko04070,ko04730
DG(18:2/20:4/0:0)	GL	DG	10	C00641	ko00561,ko00562,ko00564,ko01100,ko04070,ko04730
DG(18:1/20:5/0:0)	GL	DG	9	C00641	ko00561,ko00562,ko00564,ko01100,ko04070,ko04730
DG(16:0/22:6/0:0)	GL	DG	1	C00641	ko00561,ko00562,ko00564,ko01100,ko04070,ko04730
DG(18:2/22:4/0:0)	GL	DG	10	C00641	ko00561,ko00562,ko00564,ko01100,ko04070,ko04730
LPC(14:0/0:0)	GP	LPC	6	C04230	ko00564,ko05231
LPC(18:0/0:0)	GP	LPC	7	C04230	ko00564,ko05231
LPC(22:0/0:0)	GP	LPC	11	C04230	ko00564,ko05231
LPC(24:0/0:0)	GP	LPC	11	C04230	ko00564,ko05231
LPC(20:1/0:0)	GP	LPC	6	C04230	ko00564,ko05231
LPC(22:1/0:0)	GP	LPC	1	C04230	ko00564,ko05231
LPC(18:2/0:0)	GP	LPC	6	C04230	ko00564,ko05231
LPC(20:2/0:0)	GP	LPC	6	C04230	ko00564,ko05231
LPC(22:2/0:0)	GP	LPC	1	C04230	ko00564,ko05231
LPC(18:3/0:0)	GP	LPC	6	C04230	ko00564,ko05231
LPC(20:3/0:0)	GP	LPC	6	C04230	ko00564,ko05231
LPC(20:4/0:0)	GP	LPC	1	C04230	ko00564,ko05231
LPC(22:4/0:0)	GP	LPC	1	C04230	ko00564,ko05231
LPC(20:5/0:0)	GP	LPC	1	C04230	ko00564,ko05231
LPC(22:6/0:0)	GP	LPC	7	C04230	ko00564,ko05231
LPC(O-14:0/0:0)	GP	LPC-O	4	-	--
LPC(O-16:0/0:0)	GP	LPC-O	6	-	--
LPC(O-18:0/0:0)	GP	LPC-O	1	C04317	ko00565,ko01100
LPC(O-22:0/0:0)	GP	LPC-O	5	-	--
LPC(O-18:1/0:0)	GP	LPC-O	6	-	--
LPC(O-20:1/0:0)	GP	LPC-O	1	-	--
LPC(O-22:1/0:0)	GP	LPC-O	1	-	--
LPE(0:0/22:0)	GP	LPE	11	C04438	ko00564
LPE(0:0/20:1)	GP	LPE	9	C04438	ko00564
LPE(0:0/24:1)	GP	LPE	1	C04438	ko00564
LPE(0:0/18:2)	GP	LPE	7	C04438	ko00564
LPE(0:0/22:4)	GP	LPE	1	C04438	ko00564
LPE(0:0/22:6)	GP	LPE	7	C04438	ko00564
LPE(0:0/24:6)	GP	LPE	1	C04438	ko00564
LPG(16:0/0:0)	GP	LPG	3	-	--
LPS(18:0/0:0)	GP	LPS	5	-	--
LPS(18:1/0:0)	GP	LPS	5	-	--
MG(18:1/0:0/0:0)	GL	MG	10	C01885	ko00561,ko01100,ko04714,ko04923,ko04975,ko04977
PC(16:0/14:0)	GP	PC	1	C00157	ko00564,ko00590,ko00591,ko00592,ko01100,ko04723,ko05231
PC(16:0/16:0)	GP	PC	11	C00157	ko00564,ko00590,ko00591,ko00592,ko01100,ko04723,ko05231
PC(16:0/22:0)	GP	PC	1	C00157	ko00564,ko00590,ko00591,ko00592,ko01100,ko04723,ko05231
PC(16:0/16:1)	GP	PC	6	C00157	ko00564,ko00590,ko00591,ko00592,ko01100,ko04723,ko05231
PC(16:0/18:1)	GP	PC	6	C00157	ko00564,ko00590,ko00591,ko00592,ko01100,ko04723,ko05231
PC(20:1/20:0)	GP	PC	1	C00157	ko00564,ko00590,ko00591,ko00592,ko01100,ko04723,ko05231
PC(20:0/22:1)	GP	PC	1	C00157	ko00564,ko00590,ko00591,ko00592,ko01100,ko04723,ko05231
PC(14:0/18:2)	GP	PC	6	C00157	ko00564,ko00590,ko00591,ko00592,ko01100,ko04723,ko05231
PC(12:0/22:2)	GP	PC	9	C00157	ko00564,ko00590,ko00591,ko00592,ko01100,ko04723,ko05231
PC(16:0/18:2)	GP	PC	6	C00157	ko00564,ko00590,ko00591,ko00592,ko01100,ko04723,ko05231
PC(18:2/22:0)	GP	PC	1	C00157	ko00564,ko00590,ko00591,ko00592,ko01100,ko04723,ko05231
PC(20:1/22:1)	GP	PC	1	C00157	ko00564,ko00590,ko00591,ko00592,ko01100,ko04723,ko05231
PC(14:0/18:3)	GP	PC	6	C00157	ko00564,ko00590,ko00591,ko00592,ko01100,ko04723,ko05231
PC(14:0/20:3)	GP	PC	1	C00157	ko00564,ko00590,ko00591,ko00592,ko01100,ko04723,ko05231
PC(18:1/18:2)	GP	PC	6	C00157	ko00564,ko00590,ko00591,ko00592,ko01100,ko04723,ko05231
PC(16:0/20:3)	GP	PC	9	C00157	ko00564,ko00590,ko00591,ko00592,ko01100,ko04723,ko05231
PC(16:1/22:2)	GP	PC	6	C00157	ko00564,ko00590,ko00591,ko00592,ko01100,ko04723,ko05231
PC(22:2/18:1)	GP	PC	1	C00157	ko00564,ko00590,ko00591,ko00592,ko01100,ko04723,ko05231
PC(16:1/18:3)	GP	PC	8	C00157	ko00564,ko00590,ko00591,ko00592,ko01100,ko04723,ko05231
PC(14:0/20:4)	GP	PC	6	C00157	ko00564,ko00590,ko00591,ko00592,ko01100,ko04723,ko05231
PC(18:3/18:1)	GP	PC	6	C00157	ko00564,ko00590,ko00591,ko00592,ko01100,ko04723,ko05231
PC(22:4/16:0)	GP	PC	1	C00157	ko00564,ko00590,ko00591,ko00592,ko01100,ko04723,ko05231
PC(18:0/20:4)	GP	PC	1	C00157	ko00564,ko00590,ko00591,ko00592,ko01100,ko04723,ko05231
PC(18:2/18:3)	GP	PC	5	C00157	ko00564,ko00590,ko00591,ko00592,ko01100,ko04723,ko05231
PC(22:4/14:1)	GP	PC	1	C00157	ko00564,ko00590,ko00591,ko00592,ko01100,ko04723,ko05231
PC(16:0/22:5)	GP	PC	1	C00157	ko00564,ko00590,ko00591,ko00592,ko01100,ko04723,ko05231
PC(18:0/22:5)	GP	PC	1	C00157	ko00564,ko00590,ko00591,ko00592,ko01100,ko04723,ko05231
PC(22:0/20:5)	GP	PC	1	C00157	ko00564,ko00590,ko00591,ko00592,ko01100,ko04723,ko05231
PC(18:0/22:6)	GP	PC	1	C00157	ko00564,ko00590,ko00591,ko00592,ko01100,ko04723,ko05231
PC(16:1/22:6)	GP	PC	1	C00157	ko00564,ko00590,ko00591,ko00592,ko01100,ko04723,ko05231
PC(18:1/22:6)	GP	PC	1	C00157	ko00564,ko00590,ko00591,ko00592,ko01100,ko04723,ko05231
PC(20:1/22:6)	GP	PC	6	C00157	ko00564,ko00590,ko00591,ko00592,ko01100,ko04723,ko05231
PC(18:2/22:6)	GP	PC	1	C00157	ko00564,ko00590,ko00591,ko00592,ko01100,ko04723,ko05231
PC(O-16:0/12:0)	GP	PC-O	6	-	--
PC(O-16:0/14:0)	GP	PC-O	1	-	--
PC(O-16:0/16:0)	GP	PC-O	6	-	--
PC(O-18:0/20:0)	GP	PC-O	7	-	--
PC(O-16:0/14:1)	GP	PC-O	3	-	--
PC(O-16:0/16:1)	GP	PC-O	3	-	--
PC(O-16:0/18:1)	GP	PC-O	6	-	--
PC(O-18:1/20:0)	GP	PC-O	3	-	--
PC(O-16:0/18:2)	GP	PC-O	6	-	--
PC(O-18:0/18:2)	GP	PC-O	1	-	--
PC(O-20:0/22:2)	GP	PC-O	1	-	--
PC(O-16:2/18:1)	GP	PC-O	1	-	--
PC(O-16:0/20:3)	GP	PC-O	1	-	--
PC(O-18:0/20:3)	GP	PC-O	1	-	--
PC(O-16:0/18:4)	GP	PC-O	5	-	--
PC(O-18:2/18:2)	GP	PC-O	6	-	--
PC(O-18:0/20:4)	GP	PC-O	1	-	--
PC(O-16:1/20:4)	GP	PC-O	1	-	--
PC(O-18:1/20:4)	GP	PC-O	6	-	--
PC(O-22:2/22:3)	GP	PC-O	6	-	--
PC(O-18:2/18:4)	GP	PC-O	1	-	--
PC(O-16:0/22:6)	GP	PC-O	2	-	--
PC(O-18:0/22:6)	GP	PC-O	6	-	--
PC(O-18:2/20:6)	GP	PC-O	1	-	--
PC(O-20:1/20:6)	GP	PC-O	9	-	--
PC(O-20:4/20:4)	GP	PC-O	6	-	--
PE(16:0/14:0)	GP	PE	4	C00350	ko00563,ko00564,ko01100,ko04136,ko04140,ko04723,ko05130,ko05167
PE(16:0/16:0)	GP	PE	11	C00350	ko00563,ko00564,ko01100,ko04136,ko04140,ko04723,ko05130,ko05167
PE(16:0/18:0)	GP	PE	1	C00350	ko00563,ko00564,ko01100,ko04136,ko04140,ko04723,ko05130,ko05167
PE(18:0/18:0)	GP	PE	7	C00350	ko00563,ko00564,ko01100,ko04136,ko04140,ko04723,ko05130,ko05167
PE(22:0/18:0)	GP	PE	1	C00350	ko00563,ko00564,ko01100,ko04136,ko04140,ko04723,ko05130,ko05167
PE(16:1/14:0)	GP	PE	4	C00350	ko00563,ko00564,ko01100,ko04136,ko04140,ko04723,ko05130,ko05167
PE(16:1/16:0)	GP	PE	4	C00350	ko00563,ko00564,ko01100,ko04136,ko04140,ko04723,ko05130,ko05167
PE(16:1/18:0)	GP	PE	11	C00350	ko00563,ko00564,ko01100,ko04136,ko04140,ko04723,ko05130,ko05167
PE(20:1/18:0)	GP	PE	1	C00350	ko00563,ko00564,ko01100,ko04136,ko04140,ko04723,ko05130,ko05167
PE(24:0/18:1)	GP	PE	1	C00350	ko00563,ko00564,ko01100,ko04136,ko04140,ko04723,ko05130,ko05167
PE(18:2/14:0)	GP	PE	8	C00350	ko00563,ko00564,ko01100,ko04136,ko04140,ko04723,ko05130,ko05167
PE(16:0/18:2)	GP	PE	7	C00350	ko00563,ko00564,ko01100,ko04136,ko04140,ko04723,ko05130,ko05167
PE(18:1/18:1)	GP	PE	1	C00350	ko00563,ko00564,ko01100,ko04136,ko04140,ko04723,ko05130,ko05167
PE(20:0/18:2)	GP	PE	1	C00350	ko00563,ko00564,ko01100,ko04136,ko04140,ko04723,ko05130,ko05167
PE(22:0/18:2)	GP	PE	6	C00350	ko00563,ko00564,ko01100,ko04136,ko04140,ko04723,ko05130,ko05167
PE(22:1/20:1)	GP	PE	6	C00350	ko00563,ko00564,ko01100,ko04136,ko04140,ko04723,ko05130,ko05167
PE(18:1/18:2)	GP	PE	9	C00350	ko00563,ko00564,ko01100,ko04136,ko04140,ko04723,ko05130,ko05167
PE(20:3/18:0)	GP	PE	6	C00350	ko00563,ko00564,ko01100,ko04136,ko04140,ko04723,ko05130,ko05167
PE(18:1/22:2)	GP	PE	1	C00350	ko00563,ko00564,ko01100,ko04136,ko04140,ko04723,ko05130,ko05167
PE(18:3/16:1)	GP	PE	5	C00350	ko00563,ko00564,ko01100,ko04136,ko04140,ko04723,ko05130,ko05167
PE(16:0/20:4)	GP	PE	1	C00350	ko00563,ko00564,ko01100,ko04136,ko04140,ko04723,ko05130,ko05167
PE(18:0/20:4)	GP	PE	6	C00350	ko00563,ko00564,ko01100,ko04136,ko04140,ko04723,ko05130,ko05167
PE(18:0/22:4)	GP	PE	1	C00350	ko00563,ko00564,ko01100,ko04136,ko04140,ko04723,ko05130,ko05167
PE(22:4/22:0)	GP	PE	1	C00350	ko00563,ko00564,ko01100,ko04136,ko04140,ko04723,ko05130,ko05167
PE(18:1/20:4)	GP	PE	6	C00350	ko00563,ko00564,ko01100,ko04136,ko04140,ko04723,ko05130,ko05167
PE(20:1/20:4)	GP	PE	1	C00350	ko00563,ko00564,ko01100,ko04136,ko04140,ko04723,ko05130,ko05167
PE(22:1/20:4)	GP	PE	1	C00350	ko00563,ko00564,ko01100,ko04136,ko04140,ko04723,ko05130,ko05167
PE(22:2/22:3)	GP	PE	6	C00350	ko00563,ko00564,ko01100,ko04136,ko04140,ko04723,ko05130,ko05167
PE(16:0/22:6)	GP	PE	1	C00350	ko00563,ko00564,ko01100,ko04136,ko04140,ko04723,ko05130,ko05167
PE(18:0/22:6)	GP	PE	1	C00350	ko00563,ko00564,ko01100,ko04136,ko04140,ko04723,ko05130,ko05167
PE(22:6/18:1)	GP	PE	1	C00350	ko00563,ko00564,ko01100,ko04136,ko04140,ko04723,ko05130,ko05167
PE(20:3/20:5)	GP	PE	1	C00350	ko00563,ko00564,ko01100,ko04136,ko04140,ko04723,ko05130,ko05167
PE(P-18:0/16:0)	GP	PE-P	1	-	--
PE(P-18:0/18:0)	GP	PE-P	7	-	--
PE(P-18:0/20:0)	GP	PE-P	7	-	--
PE(P-16:0/18:1)	GP	PE-P	6	-	--
PE(P-18:0/18:1)	GP	PE-P	7	-	--
PE(P-18:0/20:1)	GP	PE-P	7	-	--
PE(P-16:0/18:2)	GP	PE-P	1	-	--
PE(P-18:2/18:0)	GP	PE-P	1	-	--
PE(P-18:0/20:2)	GP	PE-P	1	-	--
PE(P-18:0/18:3)	GP	PE-P	6	C00350	ko00563,ko00564,ko01100,ko04136,ko04140,ko04723,ko05130,ko05167
PE(P-18:0/20:3)	GP	PE-P	6	-	--
PE(P-20:0/20:3)	GP	PE-P	1	-	--
PE(P-20:0/22:3)	GP	PE-P	7	-	--
PE(P-16:0/20:4)	GP	PE-P	1	-	--
PE(P-18:0/20:4)	GP	PE-P	1	C00350	ko00563,ko00564,ko01100,ko04136,ko04140,ko04723,ko05130,ko05167
PE(P-18:0/20:5)	GP	PE-P	1	-	--
PE(P-18:0/22:5)	GP	PE-P	1	-	--
PE(P-20:1/22:4)	GP	PE-P	7	-	--
PE(P-20:1/24:4)	GP	PE-P	6	-	--
PE(P-16:0/22:6)	GP	PE-P	6	C00350	ko00563,ko00564,ko01100,ko04136,ko04140,ko04723,ko05130,ko05167
PE(P-18:0/22:6)	GP	PE-P	1	-	--
PE(P-18:1/22:6)	GP	PE-P	6	-	--
PG(18:0/16:0)	GP	PG	3	C00344	ko00564,ko01100
PG(18:0/18:1)	GP	PG	3	C00344	ko00564,ko01100
PS(18:0/16:1)	GP	PS	5	C02737	ko00260,ko00564,ko01100,ko05140,ko05146,ko05322
PS(22:0/20:1)	GP	PS	5	C02737	ko00260,ko00564,ko01100,ko05140,ko05146,ko05322
PS(18:2/16:0)	GP	PS	7	C02737	ko00260,ko00564,ko01100,ko05140,ko05146,ko05322
PS(18:0/18:2)	GP	PS	5	C02737	ko00260,ko00564,ko01100,ko05140,ko05146,ko05322
PS(18:2/20:0)	GP	PS	5	C02737	ko00260,ko00564,ko01100,ko05140,ko05146,ko05322
PS(20:2/20:0)	GP	PS	5	C02737	ko00260,ko00564,ko01100,ko05140,ko05146,ko05322
PS(20:3/18:0)	GP	PS	5	C02737	ko00260,ko00564,ko01100,ko05140,ko05146,ko05322
PS(16:0/20:4)	GP	PS	5	C02737	ko00260,ko00564,ko01100,ko05140,ko05146,ko05322
PS(18:0/20:4)	GP	PS	1	C02737	ko00260,ko00564,ko01100,ko05140,ko05146,ko05322
PS(20:4/20:1)	GP	PS	1	C02737	ko00260,ko00564,ko01100,ko05140,ko05146,ko05322
PS(18:0/22:6)	GP	PS	1	C02737	ko00260,ko00564,ko01100,ko05140,ko05146,ko05322
SM(d18:0/14:0)	SL	SM	3	C00550	ko00600,ko01100,ko04071,ko04217
SM(d18:0/16:0)	SL	SM	3	C00550	ko00600,ko01100,ko04071,ko04217
SM(d18:0/22:0)	SL	SM	3	C00550	ko00600,ko01100,ko04071,ko04217
SM(d18:0/24:0)	SL	SM	3	C00550	ko00600,ko01100,ko04071,ko04217
SM(d18:1/12:0)	SL	SM	3	C00550	ko00600,ko01100,ko04071,ko04217
SM(d18:1/14:0)	SL	SM	3	C00550	ko00600,ko01100,ko04071,ko04217
SM(d18:1/16:0)	SL	SM	3	C00550	ko00600,ko01100,ko04071,ko04217
SM(d18:0/18:1)	SL	SM	6	C00550	ko00600,ko01100,ko04071,ko04217
SM(d18:1/18:0)	SL	SM	12	C00550	ko00600,ko01100,ko04071,ko04217
SM(d18:1/20:0)	SL	SM	1	C00550	ko00600,ko01100,ko04071,ko04217
SM(d18:1/22:0)	SL	SM	12	C00550	ko00600,ko01100,ko04071,ko04217
SM(d18:1/24:0)	SL	SM	11	C00550	ko00600,ko01100,ko04071,ko04217
SM(d20:0/24:1)	SL	SM	3	C00550	ko00600,ko01100,ko04071,ko04217
SM(d18:1/26:0)	SL	SM	3	C00550	ko00600,ko01100,ko04071,ko04217
SM(d18:1/16:1)	SL	SM	12	C00550	ko00600,ko01100,ko04071,ko04217
SM(d18:1/20:1)	SL	SM	1	C00550	ko00600,ko01100,ko04071,ko04217
SM(d18:1/22:1)	SL	SM	12	C00550	ko00600,ko01100,ko04071,ko04217
SM(d18:1/24:1)	SL	SM	12	C00550	ko00600,ko01100,ko04071,ko04217
SM(d18:1/26:1)	SL	SM	3	C00550	ko00600,ko01100,ko04071,ko04217
SM(d18:2/20:1)	SL	SM	12	C00550	ko00600,ko01100,ko04071,ko04217
SM(d18:2/22:1)	SL	SM	11	C00550	ko00600,ko01100,ko04071,ko04217
SM(d18:2/24:1)	SL	SM	1	C00550	ko00600,ko01100,ko04071,ko04217
TG(14:0/14:0/16:0)	GL	TG	1	C00422	ko00561,ko01100,ko04714,ko04923,ko04931,ko04975,ko04977,ko04979
TG(14:0/16:0/16:0)	GL	TG	1	C00422	ko00561,ko01100,ko04714,ko04923,ko04931,ko04975,ko04977,ko04979
TG(14:0/16:0/18:0)	GL	TG	6	C00422	ko00561,ko01100,ko04714,ko04923,ko04931,ko04975,ko04977,ko04979
TG(16:0/16:0/18:0)	GL	TG	6	C00422	ko00561,ko01100,ko04714,ko04923,ko04931,ko04975,ko04977,ko04979
TG(14:0/18:0/18:0)	GL	TG	6	C00422	ko00561,ko01100,ko04714,ko04923,ko04931,ko04975,ko04977,ko04979
TG(14:0/14:0/18:1)	GL	TG	1	C00422	ko00561,ko01100,ko04714,ko04923,ko04931,ko04975,ko04977,ko04979
TG(14:0/14:0/20:1)	GL	TG	1	C00422	ko00561,ko01100,ko04714,ko04923,ko04931,ko04975,ko04977,ko04979
TG(14:0/16:0/18:1)	GL	TG	1	C00422	ko00561,ko01100,ko04714,ko04923,ko04931,ko04975,ko04977,ko04979
TG(16:0/16:0/16:1)	GL	TG	1	C00422	ko00561,ko01100,ko04714,ko04923,ko04931,ko04975,ko04977,ko04979
TG(16:0/16:0/18:1)	GL	TG	1	C00422	ko00561,ko01100,ko04714,ko04923,ko04931,ko04975,ko04977,ko04979
TG(14:0/18:0/18:1)	GL	TG	1	C00422	ko00561,ko01100,ko04714,ko04923,ko04931,ko04975,ko04977,ko04979
TG(14:0/16:1/20:0)	GL	TG	6	C00422	ko00561,ko01100,ko04714,ko04923,ko04931,ko04975,ko04977,ko04979
TG(16:0/16:1/20:0)	GL	TG	6	C00422	ko00561,ko01100,ko04714,ko04923,ko04931,ko04975,ko04977,ko04979
TG(14:0/18:1/20:0)	GL	TG	6	C00422	ko00561,ko01100,ko04714,ko04923,ko04931,ko04975,ko04977,ko04979
TG(14:0/18:0/20:1)	GL	TG	6	C00422	ko00561,ko01100,ko04714,ko04923,ko04931,ko04975,ko04977,ko04979
TG(16:0/16:1/22:0)	GL	TG	1	C00422	ko00561,ko01100,ko04714,ko04923,ko04931,ko04975,ko04977,ko04979
TG(18:0/18:0/18:1)	GL	TG	9	C00422	ko00561,ko01100,ko04714,ko04923,ko04931,ko04975,ko04977,ko04979
TG(14:0/20:0/20:1)	GL	TG	1	C00422	ko00561,ko01100,ko04714,ko04923,ko04931,ko04975,ko04977,ko04979
TG(14:1/14:1/16:0)	GL	TG	1	C00422	ko00561,ko01100,ko04714,ko04923,ko04931,ko04975,ko04977,ko04979
TG(14:0/14:1/18:1)	GL	TG	6	C00422	ko00561,ko01100,ko04714,ko04923,ko04931,ko04975,ko04977,ko04979
TG(14:0/14:0/18:2)	GL	TG	1	C00422	ko00561,ko01100,ko04714,ko04923,ko04931,ko04975,ko04977,ko04979
TG(14:1/16:0/16:1)	GL	TG	1	C00422	ko00561,ko01100,ko04714,ko04923,ko04931,ko04975,ko04977,ko04979
TG(16:0/16:1/16:1)	GL	TG	1	C00422	ko00561,ko01100,ko04714,ko04923,ko04931,ko04975,ko04977,ko04979
TG(14:0/16:1/18:1)	GL	TG	1	C00422	ko00561,ko01100,ko04714,ko04923,ko04931,ko04975,ko04977,ko04979
TG(14:0/16:0/18:2)	GL	TG	1	C00422	ko00561,ko01100,ko04714,ko04923,ko04931,ko04975,ko04977,ko04979
TG(14:0/18:1/18:1)	GL	TG	1	C00422	ko00561,ko01100,ko04714,ko04923,ko04931,ko04975,ko04977,ko04979
TG(16:0/16:1/18:1)	GL	TG	1	C00422	ko00561,ko01100,ko04714,ko04923,ko04931,ko04975,ko04977,ko04979
TG(14:0/18:0/18:2)	GL	TG	1	C00422	ko00561,ko01100,ko04714,ko04923,ko04931,ko04975,ko04977,ko04979
TG(14:0/18:1/20:1)	GL	TG	6	C00422	ko00561,ko01100,ko04714,ko04923,ko04931,ko04975,ko04977,ko04979
TG(16:0/16:1/20:1)	GL	TG	6	C00422	ko00561,ko01100,ko04714,ko04923,ko04931,ko04975,ko04977,ko04979
TG(14:0/18:0/20:2)	GL	TG	6	C00422	ko00561,ko01100,ko04714,ko04923,ko04931,ko04975,ko04977,ko04979
TG(16:0/16:1/22:1)	GL	TG	1	C00422	ko00561,ko01100,ko04714,ko04923,ko04931,ko04975,ko04977,ko04979
TG(14:0/20:1/20:1)	GL	TG	1	C00422	ko00561,ko01100,ko04714,ko04923,ko04931,ko04975,ko04977,ko04979
TG(16:1/18:1/20:0)	GL	TG	6	C00422	ko00561,ko01100,ko04714,ko04923,ko04931,ko04975,ko04977,ko04979
TG(18:0/18:1/18:1)	GL	TG	6	C00422	ko00561,ko01100,ko04714,ko04923,ko04931,ko04975,ko04977,ko04979
TG(14:0/18:2/22:0)	GL	TG	6	C00422	ko00561,ko01100,ko04714,ko04923,ko04931,ko04975,ko04977,ko04979
TG(18:0/18:2/20:0)	GL	TG	6	C00422	ko00561,ko01100,ko04714,ko04923,ko04931,ko04975,ko04977,ko04979
TG(18:1/18:1/20:0)	GL	TG	6	C00422	ko00561,ko01100,ko04714,ko04923,ko04931,ko04975,ko04977,ko04979
TG(14:0/14:1/18:2)	GL	TG	1	C00422	ko00561,ko01100,ko04714,ko04923,ko04931,ko04975,ko04977,ko04979
TG(12:0/18:0/18:3)	GL	TG	1	C00422	ko00561,ko01100,ko04714,ko04923,ko04931,ko04975,ko04977,ko04979
TG(14:1/16:1/18:1)	GL	TG	1	C00422	ko00561,ko01100,ko04714,ko04923,ko04931,ko04975,ko04977,ko04979
TG(14:0/16:1/18:2)	GL	TG	1	C00422	ko00561,ko01100,ko04714,ko04923,ko04931,ko04975,ko04977,ko04979
TG(14:0/18:1/18:2)	GL	TG	1	C00422	ko00561,ko01100,ko04714,ko04923,ko04931,ko04975,ko04977,ko04979
TG(16:0/16:1/18:2)	GL	TG	1	C00422	ko00561,ko01100,ko04714,ko04923,ko04931,ko04975,ko04977,ko04979
TG(14:0/18:1/20:2)	GL	TG	1	C00422	ko00561,ko01100,ko04714,ko04923,ko04931,ko04975,ko04977,ko04979
TG(14:0/18:2/20:1)	GL	TG	6	C00422	ko00561,ko01100,ko04714,ko04923,ko04931,ko04975,ko04977,ko04979
TG(16:0/16:1/20:2)	GL	TG	6	C00422	ko00561,ko01100,ko04714,ko04923,ko04931,ko04975,ko04977,ko04979
TG(14:0/18:0/20:3)	GL	TG	1	C00422	ko00561,ko01100,ko04714,ko04923,ko04931,ko04975,ko04977,ko04979
TG(16:0/16:0/22:3)	GL	TG	1	C00422	ko00561,ko01100,ko04714,ko04923,ko04931,ko04975,ko04977,ko04979
TG(18:0/18:1/18:2)	GL	TG	6	C00422	ko00561,ko01100,ko04714,ko04923,ko04931,ko04975,ko04977,ko04979
TG(18:1/18:2/20:0)	GL	TG	1	C00422	ko00561,ko01100,ko04714,ko04923,ko04931,ko04975,ko04977,ko04979
TG(14:0/20:1/22:2)	GL	TG	6	C00422	ko00561,ko01100,ko04714,ko04923,ko04931,ko04975,ko04977,ko04979
TG(12:0/18:2/18:2)	GL	TG	1	C00422	ko00561,ko01100,ko04714,ko04923,ko04931,ko04975,ko04977,ko04979
TG(16:1/16:1/18:2)	GL	TG	1	C00422	ko00561,ko01100,ko04714,ko04923,ko04931,ko04975,ko04977,ko04979
TG(14:0/18:1/18:3)	GL	TG	1	C00422	ko00561,ko01100,ko04714,ko04923,ko04931,ko04975,ko04977,ko04979
TG(16:0/16:1/18:3)	GL	TG	1	C00422	ko00561,ko01100,ko04714,ko04923,ko04931,ko04975,ko04977,ko04979
TG(14:0/18:1/20:3)	GL	TG	1	C00422	ko00561,ko01100,ko04714,ko04923,ko04931,ko04975,ko04977,ko04979
TG(14:0/18:2/20:2)	GL	TG	1	C00422	ko00561,ko01100,ko04714,ko04923,ko04931,ko04975,ko04977,ko04979
TG(14:0/16:0/22:4)	GL	TG	1	C00422	ko00561,ko01100,ko04714,ko04923,ko04931,ko04975,ko04977,ko04979
TG(14:0/18:0/20:4)	GL	TG	7	C00422	ko00561,ko01100,ko04714,ko04923,ko04931,ko04975,ko04977,ko04979
TG(18:1/18:1/18:2)	GL	TG	6	C00422	ko00561,ko01100,ko04714,ko04923,ko04931,ko04975,ko04977,ko04979
TG(14:0/18:0/22:4)	GL	TG	6	C00422	ko00561,ko01100,ko04714,ko04923,ko04931,ko04975,ko04977,ko04979
TG(18:1/18:3/20:0)	GL	TG	6	C00422	ko00561,ko01100,ko04714,ko04923,ko04931,ko04975,ko04977,ko04979
TG(16:1/20:1/20:2)	GL	TG	1	C00422	ko00561,ko01100,ko04714,ko04923,ko04931,ko04975,ko04977,ko04979
TG(18:2/18:2/20:0)	GL	TG	1	C00422	ko00561,ko01100,ko04714,ko04923,ko04931,ko04975,ko04977,ko04979
TG(16:1/16:1/20:3)	GL	TG	1	C00422	ko00561,ko01100,ko04714,ko04923,ko04931,ko04975,ko04977,ko04979
TG(14:0/18:1/20:4)	GL	TG	1	C00422	ko00561,ko01100,ko04714,ko04923,ko04931,ko04975,ko04977,ko04979
TG(16:0/16:1/20:4)	GL	TG	1	C00422	ko00561,ko01100,ko04714,ko04923,ko04931,ko04975,ko04977,ko04979
TG(14:0/18:3/20:2)	GL	TG	1	C00422	ko00561,ko01100,ko04714,ko04923,ko04931,ko04975,ko04977,ko04979
TG(18:1/18:2/18:2)	GL	TG	1	C00422	ko00561,ko01100,ko04714,ko04923,ko04931,ko04975,ko04977,ko04979
TG(18:0/18:2/18:3)	GL	TG	1	C00422	ko00561,ko01100,ko04714,ko04923,ko04931,ko04975,ko04977,ko04979
TG(14:0/20:1/20:4)	GL	TG	1	C00422	ko00561,ko01100,ko04714,ko04923,ko04931,ko04975,ko04977,ko04979
TG(18:2/18:3/20:0)	GL	TG	1	C00422	ko00561,ko01100,ko04714,ko04923,ko04931,ko04975,ko04977,ko04979
TG(18:1/18:3/20:1)	GL	TG	6	C00422	ko00561,ko01100,ko04714,ko04923,ko04931,ko04975,ko04977,ko04979
TG(14:0/20:4/22:1)	GL	TG	1	C00422	ko00561,ko01100,ko04714,ko04923,ko04931,ko04975,ko04977,ko04979
TG(16:0/16:0/22:6)	GL	TG	1	C00422	ko00561,ko01100,ko04714,ko04923,ko04931,ko04975,ko04977,ko04979
TG(18:2/18:2/18:2)	GL	TG	1	C00422	ko00561,ko01100,ko04714,ko04923,ko04931,ko04975,ko04977,ko04979
TG(18:1/18:2/18:3)	GL	TG	1	C00422	ko00561,ko01100,ko04714,ko04923,ko04931,ko04975,ko04977,ko04979
TG(14:0/18:3/22:3)	GL	TG	1	C00422	ko00561,ko01100,ko04714,ko04923,ko04931,ko04975,ko04977,ko04979
TG(14:0/20:2/20:4)	GL	TG	7	C00422	ko00561,ko01100,ko04714,ko04923,ko04931,ko04975,ko04977,ko04979
TG(18:2/18:2/18:3)	GL	TG	1	C00422	ko00561,ko01100,ko04714,ko04923,ko04931,ko04975,ko04977,ko04979
TG(18:1/18:3/18:3)	GL	TG	1	C00422	ko00561,ko01100,ko04714,ko04923,ko04931,ko04975,ko04977,ko04979
TG(14:0/20:4/22:3)	GL	TG	1	C00422	ko00561,ko01100,ko04714,ko04923,ko04931,ko04975,ko04977,ko04979
TG(16:0/18:1/22:6)	GL	TG	1	C00422	ko00561,ko01100,ko04714,ko04923,ko04931,ko04975,ko04977,ko04979
TG(14:0/20:4/22:4)	GL	TG	7	C00422	ko00561,ko01100,ko04714,ko04923,ko04931,ko04975,ko04977,ko04979
TG(14:0/20:2/22:6)	GL	TG	1	C00422	ko00561,ko01100,ko04714,ko04923,ko04931,ko04975,ko04977,ko04979
TG(14:0/22:3/22:6)	GL	TG	1	C00422	ko00561,ko01100,ko04714,ko04923,ko04931,ko04975,ko04977,ko04979
