# Supplementary material for: Dietary Interventions of Salmon and Silver Carp Phospholipids on Mice with Metabolic Syndrome Based on Lipidomics
Source: Cells. 2022 Oct 12;11(20):3199. doi: 10.3390/cells11203199 (PMC9601277; doi:10.3390/cells11203199)
Supplement: Supplementary file 1 [file cells-11-03199-s001.zip › Supplementary Table S3. Lipid species with significant variations in different types of lipid groups and LF and HF groups.xlsx]

## Sheet: SA4
Group	HF vs HM4，HF vs HM2，LF vs HF	HF vs SA4，HF vs SA2，LF vs HF
	5-iso PGF2VI	FFA(16:1)
	FFA(19:1)	FFA(17:1)
	FFA(18:2)	FFA(18:1)
	FFA(18:3)	FFA(19:1)
	FFA(20:5)	FFA(16:2)
	Coenzyme Q9	FFA(18:2)
	Coenzyme Q10	FFA(18:3)
	DG(16:0/18:2/0:0)	FFA(24:6)
	DG(18:0/18:2/0:0)	PC(18:0/18:1)
	DG(18:2/20:0/0:0)	PC(18:1/18:1)
	DG(16:0/18:3/0:0)	PC(18:2/18:2)
	DG(16:1/20:2/0:0)	PE(22:6/18:0)
	DG(18:1/18:2/0:0)	CE(18:3)
	DG(18:2/20:1/0:0)	DG(16:0/16:1/0:0)
	DG(18:2/18:2/0:0)	DG(14:0/18:2/0:0)
	DG(18:1/18:3/0:0)	DG(18:0/18:2/0:0)
	DG(18:2/18:3/0:0)	DG(18:1/20:1/0:0)
	DG(16:1/20:4/0:0)	DG(18:1/20:0/0:0)
	DG(18:2/20:4/0:0)	DG(18:2/20:0/0:0)
	DG(16:0/22:6/0:0)	DG(16:0/18:3/0:0)
	DG(18:2/22:4/0:0)	DG(18:2/20:1/0:0)
	LPS(18:0/0:0)	DG(18:1/18:3/0:0)
	PC(O-18:2/18:4)	DG(16:0/20:4/0:0)
	PG(18:0/16:0)	DG(18:2/18:3/0:0)
	PG(18:0/18:1)	DG(16:1/20:4/0:0)
	PS(22:0/20:1)	DG(18:1/20:4/0:0)
	PS(18:0/22:6)	DG(18:2/20:4/0:0)
	SM(d18:0/14:0)	DG(16:0/22:6/0:0)
	SM(d18:0/22:0)	DG(18:2/22:4/0:0)
	SM(d20:0/24:1)	PC(20:1/22:1)
	SM(d18:1/26:0)	PC(18:1/18:2)
	TG(16:0/16:0/18:1)	PC(16:0/22:5)
	TG(14:0/18:0/18:1)	PC(22:0/20:5)
	TG(16:0/16:1/20:0)	PC(18:2/22:6)
	TG(14:0/18:0/20:1)	PC(O-16:0/18:1)
	TG(18:0/18:0/18:1)	PC(O-18:1/20:4)
	TG(16:0/16:1/18:1)	PE(16:0/22:6)
	TG(14:0/18:0/18:2)	PE(22:6/18:1)
	TG(14:0/18:1/20:1)	SM(d20:0/24:1)
	TG(16:0/16:1/20:1)	SM(d18:1/26:0)
	TG(14:0/18:0/20:2)	TG(14:0/16:0/18:0)
	TG(16:0/16:1/22:1)	TG(16:0/16:0/18:1)
	TG(14:0/20:1/20:1)	TG(14:0/18:0/20:1)
	TG(16:1/18:1/20:0)	TG(18:0/18:0/18:1)
	TG(14:0/18:2/22:0)	TG(14:0/14:0/18:2)
	TG(14:0/18:1/20:2)	TG(16:0/16:1/16:1)
	TG(14:0/18:2/20:1)	TG(14:0/16:0/18:2)
	TG(16:0/16:1/20:2)	TG(16:0/16:1/18:1)
	TG(16:0/16:0/22:3)	TG(16:0/16:1/20:1)
	TG(18:0/18:1/18:2)	TG(14:0/18:0/20:2)
	TG(14:0/18:1/20:3)	TG(14:0/20:1/20:1)
	TG(14:0/18:2/20:2)	TG(14:0/18:1/20:2)
	TG(14:0/16:0/22:4)	TG(14:0/18:2/20:1)
	TG(18:1/18:1/18:2)	TG(16:0/16:1/20:2)
	TG(14:0/18:0/22:4)	TG(18:0/18:1/18:2)
	TG(16:0/16:1/20:4)	TG(14:0/18:1/20:3)
	TG(14:0/18:3/20:2)	TG(14:0/18:2/20:2)
	TG(18:1/18:2/18:2)	TG(14:0/16:0/22:4)
	TG(18:0/18:2/18:3)	TG(18:1/18:1/18:2)
	TG(18:2/18:2/18:2)	TG(18:1/18:2/18:2)
	TG(14:0/18:3/22:3)	TG(18:0/18:2/18:3)
	TG(18:2/18:2/18:3)	TG(18:2/18:2/18:2)
	TG(18:1/18:3/18:3)
