# Supplementary figures and images for: Dietary Interventions of Salmon and Silver Carp Phospholipids on Mice with Metabolic Syndrome Based on Lipidomics
Source: MDPI journal article supplement (doi:10.3390/cells11203199), 2022-10-12

Supplementary Figure S1: histological examination of the mice liver tissue.

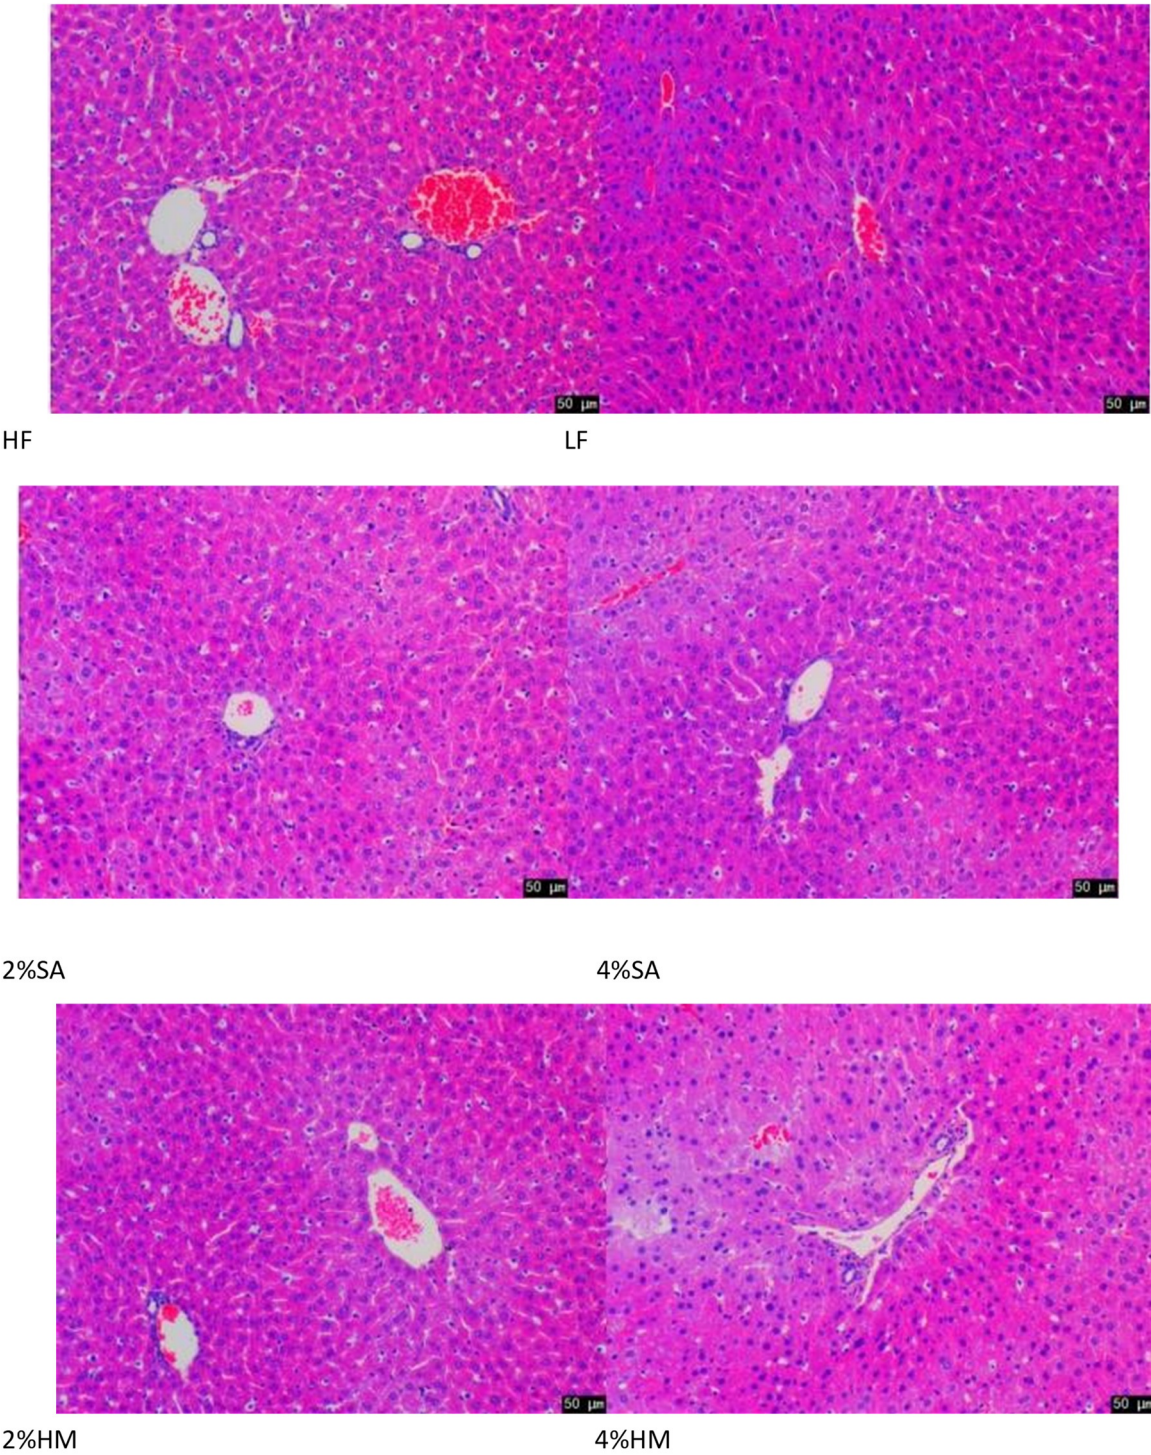

Supplement: s1 [file s1]
